# Supplementary material for: Research based on serine metabolism indicates mesenchymal stem cells alleviate psoriasis by regulating the PSPH-PINK1-Parkin-NLRP3 pathway in HaCaT
Source: Research Square preprint supplement (doi:10.21203/rs.3.rs-7307864/v1), 2025-09-17
Supplement: Supplementary file 2 [file 细胞比例统计-4样本.xls]

## Sheet: Sheet0
	cells/Single Cells/PE-A+ | Freq. of Parent	cells/Single Cells/PE-A- | Freq. of Parent
A01 kong.fcs	1.07 %	98.9 %
A02 HLA_DR.fcs	0.39 %	99.6 %
A03 CD206_1.fcs	0.52 %	99.5 %
A04 CD106_1.fcs	0.35 %	99.7 %
A05 CD45_1.fcs	0.39 %	99.6 %
A06 CD34_1.fcs	1.36 %	98.6 %
A07 CD105_1.fcs	98.9 %	1.08 %
A08 CD29_1.fcs	99.5 %	0.51 %
A09 CD90_1.fcs	99.6 %	0.37 %
A10 CD73-1.fcs	97.5 %	2.55 %
A11 CD44_1.fcs	99.8 %	0.19 %
B02 HLA_DR_2.fcs	0.39 %	99.6 %
B03 CD206_2.fcs	0.37 %	99.6 %
B04 CD106_2.fcs	0.37 %	99.6 %
B05 CD45_2.fcs	0.47 %	99.5 %
B06 CD34_2.fcs	1.12 %	98.9 %
B07 CD105_2.fcs	99.3 %	0.74 %
B08 CD29_2.fcs	99.5 %	0.47 %
B09 CD90_2.fcs	99.7 %	0.34 %
B10 CD73-2.fcs	95.9 %	4.11 %
B11 CD44_2.fcs	99.6 %	0.37 %
C02 HLA_DR_3.fcs	0.62 %	99.4 %
C03 CD206_3.fcs	0.43 %	99.6 %
C04 CD106_3.fcs	0.45 %	99.5 %
C05 CD45_3.fcs	0.33 %	99.7 %
C06 CD34_3.fcs	1.57 %	98.4 %
C07 CD105_3.fcs	98.7 %	1.29 %
C08 CD29_3.fcs	99.4 %	0.57 %
C09 CD90_3.fcs	99.7 %	0.29 %
C10 CD73-3.fcs	97.3 %	2.69 %
C11 CD44_3.fcs	99.8 %	0.19 %
D02 HLA_DR_4.fcs	0.30 %	99.7 %
D03 CD206_4.fcs	0.41 %	99.6 %
D04 CD106_4.fcs	0.44 %	99.6 %
D05 CD45_4.fcs	0.39 %	99.6 %
D06 CD34_4.fcs	2.03 %	98.0 %
D07 CD105_4.fcs	98.5 %	1.47 %
D08 CD29_4.fcs	99.4 %	0.56 %
D09 CD90_4.fcs	99.7 %	0.25 %
D10 CD73-4.fcs	97.6 %	2.40 %
D11 CD44_4.fcs	99.8 %	0.21 %
Mean	48.6 %	51.4 %
SD	49.8 %	49.8 %
